# Supplementary material for: Utilization of Primary Healthcare Services in Patients with Multimorbidity According to Their Risk Level by Adjusted Morbidity Groups: A Cross-Sectional Study in Chamartín District (Madrid)
Source: MDPI journal article supplement (doi:10.3390/healthcare12020270), 2024-01-20
Supplement: s1 [file s1]

## **SUPPLEMENTARY MATERIAL**

**Table S1.** Types of chronic diseases considered by the Adjusted Morbidity Group (AMG) in the Community of Madrid at the time of data extraction.

|                                          |                                              |
|------------------------------------------|----------------------------------------------|
| Alcohol abuse                            | Hypertension                                 |
| Anaemia                                  | Ischemic heart disease                       |
| Aorta aneurysm                           | Leukemia                                     |
| Anxiety                                  | Liver cancer                                 |
| Arthritis                                | Lung cancer                                  |
| Arthrosis                                | Mental retardation                           |
| Asthma                                   | Multiple sclerosis                           |
| Attention-Deficit/Hyperactivity Disorder | Obesity                                      |
| Bladder cancer                           | Obstructive chronic pulmonary disease (OCPD) |
| Breast cancer                            | Osteoarthritis                               |
| Cardiopulmonary disease                  | Osteoporosis                                 |
| Central nervous system cancer            | Pancreatic cancer                            |
| Cervical cancer                          | Parkinson                                    |
| Cirrhosis                                | Prostate cancer                              |
| Colon cancer                             | Renal cancer                                 |
| Dementia                                 | Renal chronic failure                        |
| Depression                               | Retinoblastoma                               |
| Diabetes Mellitus                        | Schizophrenia                                |
| Dyslipidemia                             | Skin cancer                                  |
| Dysrhythmias                             | Soft tissues cancer                          |
| Ear, nose and throat cancer              | Stomach cancer                               |
| Endometrial cancer                       | Stroke                                       |
| Epilepsy                                 | Substance abuse                              |
| Gastrointestinal ulcer                   | Testicle cancer                              |
| Glaucoma                                 | Thyroid cancer                               |
| Heart chronic failure                    | Thyroid disorder                             |
| Hepatoblastoma                           | Ulcerative colitis                           |
| Hodgkin/Other lymphomas                  | Valvular heart disease                       |
| Human immunodeficiency virus (HIV)       | Vasculitis                                   |
| Hyperlipidemia                           |                                              |

**Table S2.** Sociodemographic, functional and clinical characteristics of the patients with multimorbidity by risk level according to Adjusted Morbidity Groups.

| Multimorbidity patients    | High risk   | Medium risk  | Low risk     | p-value |
|----------------------------|-------------|--------------|--------------|---------|
| n (%)                      | 440 (7.3)   | 1,721 (28.5) | 3,875 (64.2) |         |
| Sociodemographic variables |             |              |              |         |
| Female                     | 231 (52.5)  | 1120 (65.1)  | 2480 (64.0)  | <0.001  |
| Age*                       | 78.2 (12.4) | 72.8 (14.1)  | 58.6 (17.1)  | <0.001  |
| ≤ 65 years                 | 67 (15.2)   | 436 (25.3)   | 2472 (63.8)  | <0.001  |
| > 65 years                 | 373 (84.8)  | 1285 (74.7)  | 1403 (36.2)  |         |
| Origin Spain               | 384 (87.3)  | 1519 (88.3)  | 3149 (81.3)  | <0.001  |
| Europe                     | 8 (1.8)     | 45 (2.6)     | 136 (3.5)    |         |
| Rest of the world          | 48 (10.9)   | 157 (9.1)    | 590 (15.2)   |         |
| Functional variables       |             |              |              |         |
| Immobilized                | 125 (28.4)  | 124 (7.2)    | 39 (1.0)     | <0.001  |
| Institutionalized          | 42 (9.5)    | 52 (3.0)     | 51 (1.3)     | <0.001  |
| Primary caregiver          | 101 (23.0)  | 99 (5.8)     | 20 (0.5)     | <0.001  |
| Home support               | 29 (6.6)    | 38 (2.2)     | 10 (0.3)     | <0.001  |
| Palliative care            | 29 (6.6)    | 6 (0.3)      | 6 (0.2)      | <0.001  |
| Clinical variables         |             |              |              |         |
| Complexity weight*         | 30.3 (11.9) | 12.5 (2.7)   | 5.2 (2.0)    | <0.001  |
| Chronic diseases*          | 6.8 (2.3)   | 4.4 (1.5)    | 2.7 (0.9)    | <0.001  |
| Polymedicated              | 351 (79.8)  | 759 (44.1)   | 418 (10.8)   | <0.001  |

\* Mean (standard deviation).

**Table S3.** Sociodemographic, functional and clinical characteristics of the patients with multimorbidity by sex and age group.

| Multimorbidity patients<br>n (%)  | Female<br>3,831 (63.5) | Male<br>2,205 (36.5) | p-value | Age ≤ 65<br>2,975 (49.3) | Age > 65<br>3,061 (50.7) | p-value |
|-----------------------------------|------------------------|----------------------|---------|--------------------------|--------------------------|---------|
| <b>Sociodemographic variables</b> |                        |                      |         |                          |                          |         |
| Female                            | -                      | -                    | -       | 1,779 (59.8)             | 2,052 (67.0)             | <0.001  |
| Age*                              | 65.2 (17.7)            | 62.1 (17.3)          |         | 49.4 (11.8)              | 78.3 (8.1)               | <0.001  |
| ≤ 65 years                        | 1,779 (46.4)           | 1,196 (54.2)         | <0.001  | -                        | -                        | -       |
| > 65 years                        | 2,052 (53.6)           | 1,009 (45.8)         |         |                          |                          |         |
| Origin Spain                      | 3,198 (83.5)           | 1854 (84.1)          |         | 2447 (82.3)              | 2,605 (85.1)             |         |
| Europe                            | 125 (3.3)              | 64 (2.9)             | 0.703   | 103 (3.5)                | 86 (2.8)                 | 0.011   |
| Rest of the world                 | 508 (13.3)             | 287 (13.0)           |         | 425 (14.3)               | 370 (12.1)               |         |
| <b>Functional variables</b>       |                        |                      |         |                          |                          |         |
| Immobilized                       | 213 (5.6)              | 75 (3.4)             | <0.001  | 9 (0.3)                  | 279 (9.1)                | <0.001  |
| Institutionalized                 | 108 (2.8)              | 37 (1.7)             | 0.005   | 3 (0.1)                  | 142 (4.6)                | <0.001  |
| Primary caregiver                 | 156 (4.1)              | 64 (2.9)             | 0.020   | 8 (0.3)                  | 212 (6.9)                | <0.001  |
| Home support                      | 55 (1.4)               | 22 (1.0)             | 0.144   | 1 (0.0)                  | 76 (2.5)                 | <0.001  |
| Palliative care                   | 19 (0.5)               | 22 (1.0)             | 0.022   | 9 (0.3)                  | 32 (1.0)                 | <0.001  |
| <b>Clinical variables</b>         |                        |                      |         |                          |                          |         |
| High Risk Level                   | 231 (6.0)              | 209 (9.5)            |         | 67 (2.3)                 | 373 (12.2)               |         |
| Medium                            | 1,120 (29.2)           | 601 (27.3)           | <0.001  | 436 (14.7)               | 1,285 (42.0)             | <0.001  |
| Low                               | 2,480 (64.7)           | 1,395 (63.3)         |         | 2,472 (83.1)             | 1,403 (45.8)             |         |
| Complexity weight*                | 8.8 (7.2)              | 9.6 (8.7)            | <0.001  | 6.4 (5.1)                | 11.8 (8.9)               | <0.001  |
| Chronic diseases*                 | 3.6 (1.7)              | 3.4 (1.7)            | 0.001   | 2.8 (1.2)                | 4.1 (1.9)                | <0.001  |
| Polymedicated                     | 1,059 (27.6)           | 469 (21.3)           | <0.001  | 32 (1.1)                 | 1496 (48.9)              | <0.001  |

\* Mean (standard deviation).

**Table S4.** Comorbidities of the patients with multimorbidity by risk level according to Adjusted Morbidity Groups.

| Multimorbidity patients            |                                | High risk  | Medium risk  | Low risk     | p-value |
|------------------------------------|--------------------------------|------------|--------------|--------------|---------|
| n (%)                              |                                | 440 (7.3)  | 1,721 (28.5) | 3,875 (64.2) |         |
| <i>Haematic comorbidity</i>        | Anemia                         | 118 (26.8) | 164 (9.5)    | 336 (8.7)    | <0.001  |
|                                    | HIV                            | 6 (1.4)    | 11 (0.6)     | 19 (0.5)     | 0.076   |
| <i>Digestive comorbidity</i>       | Cirrhosis                      | 50 (11.4)  | 187 (10.9)   | 197 (5.1)    | <0.001  |
|                                    | Inflammatory bowel disease     | 4 (0.9)    | 20 (1.2)     | 27 (0.7)     | 0.212   |
|                                    | Gastric ulcer                  | 23 (5.2)   | 47 (2.7)     | 84 (2.2)     | 0.001   |
|                                    | Chronic pancreatitis           | 2 (0.5)    | 2 (0.1)      | 3 (0.1)      | 0.088   |
|                                    | Cystic fibrosis                | 2 (0.5)    | 0 (0.0)      | 1 (0.0)      | <0.001  |
| <i>Ocular comorbidity</i>          | Glaucoma                       | 45 (10.2)  | 154 (8.9)    | 157 (4.1)    | <0.001  |
| <i>Cardiovascular comorbidity</i>  | Hypertension                   | 364 (82.7) | 1187 (69.0)  | 1582 (40.8)  | <0.001  |
|                                    | Dysrhythmias                   | 192 (43.6) | 298 (17.3)   | 160 (4.1)    | <0.001  |
|                                    | Chronic heart failure          | 123 (28.0) | 101 (5.9)    | 14 (0.4)     | <0.001  |
|                                    | Coronary disease               | 111 (25.2) | 171 (9.9)    | 77 (2.0)     | <0.001  |
|                                    | Valvular heart disease         | 80 (18.2)  | 66 (3.8)     | 39 (1.0)     | <0.001  |
| <i>Musculoskeletal comorbidity</i> | Osteoarthritis                 | 108 (24.5) | 425 (24.7)   | 430 (11.1)   | <0.001  |
|                                    | Osteoporosis                   | 103 (23.4) | 423 (24.6)   | 508 (13.1)   | <0.001  |
|                                    | Arthritis                      | 24 (5.5)   | 94 (5.5)     | 70 (1.8)     | <0.001  |
|                                    | Lupus                          | 3 (0.7)    | 0 (0.0)      | 1 (0.0)      | 0.002   |
|                                    | Vasculitis                     | 6 (1.4)    | 7 (0.4)      | 13 (0.3)     | 0.008   |
| <i>Neurological comorbidity</i>    | Dementia                       | 56 (12.7)  | 91 (5.3)     | 53 (1.4)     | <0.001  |
|                                    | Stroke                         | 92 (20.9)  | 112 (6.5)    | 48 (1.2)     | <0.001  |
|                                    | Parkinson                      | 16 (3.6)   | 46 (2.7)     | 22 (0.6)     | <0.001  |
|                                    | Epilepsy                       | 22 (5.0)   | 41 (2.4)     | 64 (1.7)     | <0.001  |
|                                    | Multiple sclerosis             | 0 (0)      | 5 (0.3)      | 13 (0.3)     | <0.001  |
| <i>Psychiatric comorbidity</i>     | Alcohol abuse                  | 198 (5.1)  | 110 (6.4)    | 44 (10.0)    | <0.001  |
|                                    | Substance abuse                | 6 (1.4)    | 28 (1.6)     | 66 (1.7)     | 0.864   |
|                                    | Anxiety                        | 84 (19.1)  | 417 (24.2)   | 1166 (30.1)  | <0.001  |
|                                    | Depression                     | 101 (23.0) | 386 (22.4)   | 583 (15.0)   | <0.001  |
|                                    | Bipolar illness                | 4 (0.9)    | 17 (1.0)     | 35 (0.9)     | 0.954   |
|                                    | Psychotic disorder             | 5 (1.1)    | 24 (1.4)     | 36 (0.9)     | 0.295   |
| <i>Respiratory comorbidity</i>     | COPD                           | 109 (24.8) | 163 (9.5)    | 95 (2.5)     | <0.001  |
|                                    | Asthma                         | 26 (5.9)   | 167 (9.7)    | 407 (10.5)   | 0.009   |
| <i>Endocrine comorbidity</i>       | Dyslipidemia                   | 298 (67.7) | 1072 (62.3)  | 1919 (49.5)  | <0.001  |
|                                    | Diabetes mellitus              | 189 (43.0) | 432 (25.1)   | 382 (9.9)    | <0.001  |
|                                    | Obesity                        | 131 (29.8) | 463 (26.9)   | 791 (20.4)   | <0.001  |
|                                    | Thyroid disorder               | 107 (24.3) | 406 (23.6)   | 823 (21.2)   | 0.077   |
| <i>Renal comorbidity</i>           | Renal chronic failure          | 97 (22.0)  | 36 (2.1)     | 7 (0.2)      | <0.001  |
|                                    | Repeat urinary tract infection | 85 (19.3)  | 139 (8.1)    | 123 (3.2)    | <0.001  |
| <i>Cancer comorbidity</i>          | Any cancer                     | 164 (37.3) | 176 (10.2)   | 87 (2.2)     | <0.001  |
|                                    | Breast                         | 27 (6.1)   | 23 (1.3)     | 12 (0.3)     | <0.001  |
|                                    | Prostate                       | 24 (5.5)   | 31 (1.8)     | 6 (0.2)      | <0.001  |
|                                    | Skin                           | 13 (3.0)   | 20 (1.2)     | 19 (0.5)     | <0.001  |
|                                    | Colorectal                     | 20 (4.5)   | 27 (1.6)     | 6 (0.2)      | <0.001  |
|                                    | Bladder                        | 16 (3.6)   | 13 (0.8)     | 5 (0.1)      | <0.001  |
|                                    | Lung                           | 20 (4.5)   | 11 (0.6)     | 2 (0.1)      | <0.001  |
|                                    | Cervix                         | 3 (0.7)    | 3 (0.2)      | 9 (0.2)      | 0.153   |
|                                    | Liver                          | 2 (0.5)    | 3 (0.2)      | 0 (0.0)      | 0.002   |
|                                    | Gastric                        | 5 (1.1)    | 3 (0.2)      | 0 (0.0)      | <0.001  |
|                                    | Pancreas                       | 4 (0.9)    | 2 (0.1)      | 0 (0.0)      | <0.001  |
|                                    | Renal                          | 7 (1.6)    | 3 (0.2)      | 2 (0.1)      | <0.001  |
|                                    | Endometrium                    | 2 (0.5)    | 1 (0.1)      | 2 (0.1)      | 0.019   |
|                                    | Leukaemia                      | 9 (2.0)    | 14 (0.8)     | 2 (0.1)      | <0.001  |
|                                    | Lymphoma                       | 15 (3.4)   | 19 (1.1)     | 13 (0.3)     | <0.001  |

COPD: Chronic obstructive pulmonary disease.

**Table S5.** Comorbidities of the patients with multimorbidity by sex and age group.

| Multimorbidity patients            |                                | Female       | Male         | p-value | Age ≤ 65     | Age > 65     | p-value |
|------------------------------------|--------------------------------|--------------|--------------|---------|--------------|--------------|---------|
| n (%)                              |                                | 3,831 (63.5) | 2,205 (36.5) |         | 2,975 (49.3) | 3,061 (50.7) |         |
| <i>Haematic comorbidity</i>        | Anemia                         | 469 (12.2)   | 149 (6.8)    | <0.001  | 351 (11.8)   | 267 (8.7)    | <0.001  |
|                                    | HIV                            | 6 (0.2)      | 30 (1.4)     | <0.001  | 32 (1.1)     | 4 (0.1)      | <0.001  |
| <i>Digestive comorbidity</i>       | Cirrhosis                      | 230 (6.0)    | 204 (9.3)    | <0.001  | 223 (7.5)    | 211 (6.9)    | 0.365   |
|                                    | Inflammatory bowel disease     | 26 (0.7)     | 25 (1.1)     | 0.063   | 25 (0.8)     | 26 (0.8)     | 0.969   |
|                                    | Gastric ulcer                  | 71 (1.9)     | 83 (3.8)     | <0.001  | 64 (2.2)     | 90 (2.9)     | 0.052   |
|                                    | Chronic pancreatitis           | 4 (0.1)      | 3 (0.1)      | 0.728   | 3 (0.1)      | 4 (0.1)      | 0.733   |
|                                    | Cystic fibrosis                | 1 (0.0)      | 2 (0.1)      | <0.001  | 3 (0.1)      | 0 (0.0)      | 0.079   |
| <i>Ocular comorbidity</i>          | Glaucoma                       | 239 (6.2)    | 117 (5.3)    | <0.001  | 76 (2.6)     | 280 (9.1)    | <0.001  |
| <i>Cardiovascular comorbidity</i>  | Hypertension                   | 1872 (48.9)  | 1258 (57.1)  | <0.001  | 926 (31.1)   | 2207 (72.1)  | <0.001  |
|                                    | Dysrhythmias                   | 388 (10.1)   | 262 (11.9)   | 0.034   | 131 (4.4)    | 519 (17.0)   | <0.001  |
|                                    | Chronic heart failure          | 150 (3.9)    | 88 (4.0)     | 0.885   | 18 (0.6)     | 220 (7.2)    | <0.001  |
|                                    | Coronary disease               | 136 (3.5)    | 223 (10.1)   | <0.001  | 71 (2.4)     | 288 (9.4)    | <0.001  |
|                                    | Valvular heart disease         | 113 (2.9)    | 72 (3.3)     | 0.493   | 36 (1.2)     | 149 (4.9)    | <0.001  |
| <i>Musculoskeletal comorbidity</i> | Osteoarthritis                 | 753 (19.7)   | 210 (9.5)    | <0.001  | 262 (8.8)    | 701 (22.9)   | <0.001  |
|                                    | Osteoporosis                   | 990 (25.8)   | 44 (2.0)     | <0.001  | 232 (7.8)    | 802 (26.2)   | <0.001  |
|                                    | Arthritis                      | 129 (3.4)    | 59 (2.7)     | <0.001  | 91 (3.1)     | 97 (3.2)     | 0.806   |
|                                    | Lupus                          | 2 (0.1)      | 2 (0.1)      | 0.576   | 1 (0.0)      | 3 (0.1)      | 0.331   |
|                                    | Vasculitis                     | 21 (0.5)     | 5 (0.2)      | 0.066   | 8 (0.3)      | 18 (0.6)     | 0.058   |
| <i>Neurological comorbidity</i>    | Dementia                       | 152 (4.0)    | 48 (2.2)     | <0.001  | 7 (0.2)      | 193 (6.3)    | <0.001  |
|                                    | Stroke                         | 139 (3.6)    | 113 (5.1)    | 0.005   | 44 (1.5)     | 208 (6.8)    | <0.001  |
|                                    | Parkinson                      | 44 (1.1)     | 40 (1.8)     | 0.034   | 7 (0.2)      | 77 (2.5)     | <0.001  |
|                                    | Epilepsy                       | 70 (1.8)     | 57 (2.6)     | 0.048   | 71 (2.4)     | 56 (1.8)     | 0.132   |
|                                    | Multiple sclerosis             | 15 (0.4)     | 3 (0.1)      | 0.080   | 15 (0.5)     | 3 (0.1)      | 0.004   |
| <i>Psychiatric comorbidity</i>     | Alcohol abuse                  | 93 (2.4)     | 259 (11.7)   | <0.001  | 242 (8.1)    | 110 (3.6)    | <0.001  |
|                                    | Substance abuse                | 30 (0.8)     | 70 (3.2)     | <0.001  | 95 (3.2)     | 5 (0.2)      | <0.001  |
|                                    | Anxiety                        | 1211 (31.6)  | 456 (20.7)   | <0.001  | 1065 (35.8)  | 602 (19.7)   | <0.001  |
|                                    | Depression                     | 821 (21.4)   | 249 (11.3)   | <0.001  | 545 (18.3)   | 525 (17.2)   | 0.235   |
|                                    | Bipolar illness                | 34 (0.9)     | 22 (1.0)     | 0.667   | 42 (1.4)     | 14 (0.5)     | <0.001  |
|                                    | Psychotic disorder             | 35 (0.9)     | 30 (1.4)     | 0.105   | 49 (1.6)     | 16 (0.5)     | <0.001  |
| <i>Respiratory comorbidity</i>     | COPD                           | 160 (4.2)    | 207 (9.4)    | <0.001  | 101 (3.4)    | 266 (8.7)    | <0.001  |
|                                    | Asthma                         | 425 (11.1)   | 175 (7.9)    | <0.001  | 426 (14.3)   | 174 (5.7)    | <0.001  |
| <i>Endocrine comorbidity</i>       | Dyslipidemia                   | 1988 (51.9)  | 1301 (59.0)  | <0.001  | 1350 (45.6)  | 1939 (63.3)  | <0.001  |
|                                    | Diabetes mellitus              | 520 (13.6)   | 483 (21.9)   | <0.001  | 287 (9.6)    | 716 (23.4)   | <0.001  |
|                                    | Obesity                        | 833 (21.7)   | 552 (25.0)   | 0.003   | 689 (23.2)   | 696 (22.7)   | 0.697   |
|                                    | Thyroid disorder               | 1116 (29.1)  | 220 (10.0)   | <0.001  | 675 (22.7)   | 661 (21.6)   | 0.306   |
| <i>Renal comorbidity</i>           | Renal chronic failure          | 70 (1.8)     | 70 (3.2)     | 0.001   | 12 (0.4)     | 128 (4.2)    | 0.331   |
|                                    | Repeat urinary tract infection | 278 (7.3)    | 69 (3.1)     | <0.001  | 131 (4.4)    | 216 (7.1)    | <0.001  |
| <i>Cancer comorbidity</i>          | Any cancer                     | 216 (5.6)    | 211 (9.6)    | <0.001  | 135 (4.5)    | 292 (9.5)    | <0.001  |
|                                    | Breast                         | 61 (1.6)     | 1 (0.0)      | <0.001  | 25 (0.8)     | 37 (1.2)     | 0.156   |
|                                    | Prostate                       | 0 (0.0)      | 61 (2.8)     | <0.001  | 9 (0.3)      | 52 (1.7)     | <0.001  |
|                                    | Skin                           | 32 (0.8)     | 20 (0.9)     | 0.772   | 15 (0.5)     | 37 (1.2)     | 0.003   |
|                                    | Colorectal                     | 24 (0.6)     | 29 (1.3)     | 0.006   | 14 (0.5)     | 39 (1.3)     | 0.001   |
|                                    | Bladder                        | 5 (0.1)      | 29 (1.3)     | <0.001  | 10 (0.3)     | 24 (0.8)     | 0.020   |
|                                    | Lung                           | 13 (0.3)     | 20 (0.9)     | 0.004   | 9 (0.3)      | 24 (0.8)     | 0.011   |
|                                    | Cervix                         | 15 (0.4)     | 0 (0.0)      | 0.003   | 13 (0.4)     | 2 (0.1)      | 0.004   |
|                                    | Liver                          | 2 (0.1)      | 3 (0.1)      | 0.276   | 0 (0.0)      | 5 (0.2)      | 0.027   |
|                                    | Gastric                        | 3 (0.1)      | 5 (0.2)      | 0.127   | 1 (0.0)      | 7 (0.2)      | 0.037   |
|                                    | Pancreas                       | 2 (0.1)      | 4 (0.2)      | 0.125   | 1 (0.0)      | 5 (0.2)      | 0.110   |
|                                    | Renal                          | 3 (0.1)      | 9 (0.4)      | 0.006   | 3 (0.1)      | 9 (0.3)      | 0.092   |
|                                    | Endometrium                    | 5 (0.1)      | 0 (0.0)      | 0.90    | 3 (0.1)      | 2 (0.1)      | 0.632   |
|                                    | Leukaemia                      | 11 (0.3)     | 14 (0.6)     | 0.043   | 6 (0.2)      | 19 (0.6)     | 0.011   |
|                                    | Lymphoma                       | 31 (0.8)     | 16 (0.7)     | 0.722   | 13 (0.4)     | 34 (1.1)     | 0.003   |

COPD: Chronic obstructive pulmonary disease.

**Table S6.** Annual primary care services utilization in patients with multimorbidity by risk level according to Adjusted Morbidity Groups.

| <b>Primary care contacts</b>         | <b>High risk</b> | <b>Medium risk</b>  | <b>Low risk</b>     | <b>p-value</b> |
|--------------------------------------|------------------|---------------------|---------------------|----------------|
| <b>Mean (SD)</b>                     | <b>440 (7.3)</b> | <b>1,721 (28.5)</b> | <b>3,875 (64,2)</b> |                |
| <b><i>Total Annual Contacts</i></b>  | 34.1 (28.0)      | 21.5 (17.4)         | 9.8 (10.4)          | <0.001         |
| <b><i>Type of contact</i></b>        |                  |                     |                     |                |
| Health related                       | 29.1 (25.8)      | 18.5 (15.1)         | 8.4 (8.9)           | <0.001         |
| Administrative                       | 3.3 (6.8)        | 1.8 (4.8)           | 0.7 (2.6)           | <0.001         |
| Laboratory                           | 1.8 (2.4)        | 1.2 (1.5)           | 0.7 (1.1)           | <0.001         |
| <b><i>Form of contact</i></b>        |                  |                     |                     |                |
| Face-to-face                         | 26.7 (20.7)      | 19.2 (15.0)         | 9.4 (9.9)           | <0.001         |
| Telephone                            | 2.4 (7.9)        | 0.9 (2.8)           | 0.2 (0.7)           | <0.001         |
| Home visit                           | 5.3 (13.0)       | 1.5 (5.1)           | 0.2 (1.9)           | <0.001         |
| <b><i>Professional contacted</i></b> |                  |                     |                     |                |
| Doctor                               | 15.9 (11.9)      | 11.0 (8.3)          | 5.4 (5.2)           | <0.001         |
| Nurse                                | 12.9 (18.6)      | 6.6 (8.5)           | 2.5 (4.5)           | <0.001         |
| Physiotherapist                      | 0.00 (0.00)      | 0.6 (2.8)           | 0.3 (2.0)           | 0.002          |
| Midwife                              | 0.01 (0.1)       | 0.04 (0.4)          | 0.1 (0.5)           | 0.004          |
| Dentist                              | 0.00 (0.00)      | 0.06 (0.5)          | 0.04 (0.3)          | 0.120          |
| Social worker                        | 0.3 (1.5)        | 0.2 (1.0)           | 0.04 (0.4)          | <0.001         |

SD: Standard Deviation.

**Table S7.** Annual primary care services utilization in patients with multimorbidity by sex and age group.

| <b>Primary care contacts</b>         | <b>Female</b>       | <b>Male</b>         | <b>p-value</b> | <b>Age ≤ 65</b>     | <b>Age &gt; 65</b>  | <b>p-value</b> |
|--------------------------------------|---------------------|---------------------|----------------|---------------------|---------------------|----------------|
| <b>Mean (SD)</b>                     | <b>3,831 (63.5)</b> | <b>2,205 (36.5)</b> |                | <b>2,975 (49.3)</b> | <b>3,061 (50.7)</b> |                |
| <b><i>Total Annual Contacts</i></b>  | 15.3 (15.7)         | 14.3 (17.6)         | 0.011          | 10.1 (12.3)         | 19.6 (18.4)         | <0.001         |
| <b><i>Type of contact</i></b>        |                     |                     |                |                     |                     |                |
| Health related                       | 13.2 (13.6)         | 12.1 (15.5)         | 0.041          | 8.5(10.3)           | 16.9 (16.3)         | <0.001         |
| Administrative                       | 1.1 (3.7)           | 1.3 (4.2)           | <0.001         | 0.8 (2.9)           | 1.6 (4.6)           | <0.001         |
| Laboratory                           | 1.0 (1.5)           | 0.8 (1.3)           | 0.006          | 0.7 (1.1)           | 1.1 (1.6)           | <0.001         |
| <b><i>Form of contact</i></b>        |                     |                     |                |                     |                     |                |
| Face-to-face                         | 13.7 (13.2)         | 13.0 (14.8)         | 0.056          | 9.7 (11.6)          | 17.1 (14.8)         | <0.001         |
| Telephone                            | 0.6 (3.0)           | 0.5 (2.2)           | 0.128          | 0.2 (1.5)           | 0.8 (3.5)           | <0.001         |
| Home visit                           | 1.0 (4.2)           | 0.9 (5.8)           | 0.015          | 0.1 (1.2)           | 1.7 (6.6)           | <0.001         |
| <b><i>Professional contacted</i></b> |                     |                     |                |                     |                     |                |
| Doctor                               | 8.2 (7.9)           | 7.1 (7.2)           | <0.001         | 5.8 (6.4)           | 9.7 (8.3)           | <0.001         |
| Nurse                                | 4.3 (7.0)           | 4.6 (10.0)          | 0.021          | 2.2 (5.4)           | 6.5 (9.8)           | <0.001         |
| Physiotherapist                      | 0.4 (2.4)           | 0.3 (1.8)           | 0.398          | 0.3 (1.9)           | 0.4 (2.4)           | 0.094          |
| Midwife                              | 0.1 (0.5)           | 0.00 (0.02)         | <0.001         | 0.1 (0.6)           | 0.01 (0.1)          | <0.001         |
| Dentist                              | 0.04 (0.4)          | 0.05 (0.4)          | 0.656          | 0.06 (0.5)          | 0.03 (0.3)          | <0.001         |
| Social worker                        | 0.1 (0.8)           | 0.1 (0.7)           | 0.015          | 0.03 (0.3)          | 0.2 (1.0)           | <0.001         |

SD: Standard Deviation.
